# Supplementary material for: Emergent User Behavior on Twitter Modelled by a Stochastic Differential Equation
Source: PubMed Central journal article supplement (PMC4425543; doi:10.1371/journal.pone.0123876), 2015-05-08
Supplement: pone.0123876.s001.pdf [file pone.0123876.s001.pdf]

**Information on data collection.** The data used in the manuscript have been attached in one Tar GZip-compressed file directory in the Supporting Information S2 file “S2\_dataset.tar.gz”. Each file included in the compressed directory contains the timestamps of the individual tweets in standard Unix time. The data was collected using the Twitter REST API. While data was also collected using the streaming API, we found no visible difference in the analysis of the two data sets. Below is a table of time period for the individual files.

| Brand name | Start                         | End                           |
|------------|-------------------------------|-------------------------------|
| BMW        | Tue, 02 Oct 2012 19:10:35 GMT | Tue, 30 Oct 2012 10:30:26 GMT |
| Google     | Mon, 17 Sep 2012 08:05:19 GMT | Mon, 15 Oct 2012 11:58:02 GMT |
| Gucci      | Thu, 04 Oct 2012 11:47:54 GMT | Tue, 30 Oct 2012 10:25:49 GMT |
| Heineken   | Fri, 24 Jan 2014 10:57:58 GMT | Thu, 27 Mar 2014 19:41:58 GMT |
| Pepsi      | Wed, 10 Oct 2012 09:10:23 GMT | Tue, 30 Oct 2012 08:44:41 GMT |
| Samsung    | Sun, 16 Sep 2012 09:44:11 GMT | Fri, 12 Oct 2012 07:47:12 GMT |
| Starbucks  | Thu, 20 Sep 2012 07:23:39 GMT | Mon, 15 Oct 2012 12:09:09 GMT |
